# Supplementary material for: Bacterial Lifestyle in a Deep-sea Hydrothermal Vent Chimney Revealed by the Genome Sequence of the Thermophilic Bacterium Deferribacter desulfuricans SSM1
Source: PubMed Central journal article supplement — DNA Res. 2010 Feb 26;17(3):123–37. doi: 10.1093/dnares/dsq005 (PMC2885270; doi:10.1093/dnares/dsq005), 2010-02-26

SUPPLEMENTAL MATERIALS

**Table S1. Lists of bacterial species used in non-metric multidimensional scaling analysis.**

| Species                                                     | Abbreviation | Accession No. | Size of genome (Mb) | No. of CDSs | No. of COG family assigned |
|-------------------------------------------------------------|--------------|---------------|---------------------|-------------|----------------------------|
| <b><i>Deferribacteres</i></b>                               |              |               |                     |             |                            |
| <i>Deferribacter desulfuricans</i> SMM1                     | def          |               | 2.23                | 2,422       | 1,219                      |
| <b><i>Deltaproteobacteria</i></b>                           |              |               |                     |             |                            |
| <i>Desulfovibrio vulgaris</i> subsp. vulgaris Hildenborough | dvu          | NC_002937     | 3.57                | 3,531       | 1,327                      |
| <i>Geobacter sulfurreducens</i> PCA                         | gsu          | NC_002939     | 3.81                | 3,446       | 1,408                      |
| <i>Pelobacter carbinolicus</i>                              | pca          | NC_007498     | 3.67                | 3,352       | 1,405                      |
| <i>Anaeromyxobacter dehalogenans</i>                        | ade          | NC_007760     | 5.01                | 4,346       | 1,498                      |
| <i>Syntrophobacter fumaroxidans</i>                         | sfu          | NC_008554     | 4.99                | 4,064       | 1,389                      |
| <i>Desulfotalea psychrophila</i>                            | dps          | NC_006138     | 3.52                | 3,234       | 1,322                      |
| <b><i>Epsilonproteobacteria</i></b>                         |              |               |                     |             |                            |
| <i>Campylobacter jejuni</i> subsp. jejuni NCTC 11168        | cje          | NC_002163     | 1.64                | 1,634       | 1,000                      |
| <i>Thiomicrospira denitrificans</i>                         | tdn          | NC_007575     | 2.20                | 2,096       | 1,032                      |
| <i>Nitratiruptor</i> sp. SB155-2                            | nis          | NC_009662     | 1.88                | 1,843       | 1,011                      |
| <b><i>Gammaproteobacteria</i></b>                           |              |               |                     |             |                            |
| <i>Escherichia coli</i> K-12                                | eco          | NC_000913     | 4.64                | 4,133       | 2,084                      |
| <i>Methylococcus capsulatus</i>                             | mca          | NC_002977     | 3.30                | 2,956       | 1,415                      |
| <i>Pasteurella multocida</i>                                | pmu          | NC_002663     | 2.26                | 2,015       | 1,399                      |
| <i>Pseudomonas aeruginosa</i>                               | pae          | NC_002516     | 6.26                | 5,568       | 2,164                      |
| <i>Thiomicrospira crunogena</i>                             | tcx          | NC_007520     | 2.42                | 2,196       | 1,208                      |
| <i>Vibrio cholerae</i>                                      | vch          | NC_002505     | 2.96                | 3,835       | 1,847                      |
| <b><i>Betaproteobacteria</i></b>                            |              |               |                     |             |                            |
| <i>Thiobacillus denitrificans</i>                           | tbd          | NC_007404     | 2.91                | 2,827       | 1,395                      |
| <i>Methylobacillus flagellatus</i>                          | mfa          | NC_007947     | 2.97                | 2,753       | 1,339                      |
| <i>Chromobacterium violaceum</i>                            | cvi          | NC_005085     | 4.75                | 4,407       | 1,757                      |
| <i>Dechloromonas aromatica</i>                              | dar          | NC_007298     | 4.50                | 4,171       | 1,633                      |
| <b><i>Alphaproteobacteria</i></b>                           |              |               |                     |             |                            |
| <i>Caulobacter crescentus</i>                               | ccr          | NC_002696     | 4.02                | 3,737       | 1,644                      |
| <i>Sphingomonas wittichii</i>                               | swi          | NC_009511     | 5.38                | 5,345       | 1,568                      |
| <b><i>Other proteobacteria</i></b>                          |              |               |                     |             |                            |
| <i>Magnetococcus</i> sp. MC-1                               | mgm          | NC_008576     | 4.72                | 3,716       | 1,335                      |
| <b><i>Aquificae</i></b>                                     |              |               |                     |             |                            |
| <i>Aquifex aeolicus</i>                                     | aae          | NC_000918     | 1.55                | 1,560       | 1,004                      |
| <b><i>Chlorobi</i></b>                                      |              |               |                     |             |                            |
| <i>Chlorobaculum tepidum</i>                                | cte          | NC_002932     | 2.15                | 2,252       | 1,052                      |
| <i>Chlorobium chlorochromatii</i>                           | cch          | NC_007514     | 2.57                | 2,002       | 1,001                      |
| <b><i>Clostridia</i></b>                                    |              |               |                     |             |                            |
| <i>Carboxydotherrmus hydrogenoformans</i>                   | chy          | NC_007503     | 2.40                | 2,620       | 1,261                      |
| <i>Clostridium thermocellum</i>                             | cth          | NC_009012     | 3.84                | 3,191       | 1,255                      |
| <i>Thermoanaerobacter tengcongensis</i>                     | tte          | NC_003869     | 2.68                | 2,588       | 1,236                      |
| <i>Alkaliphilus oremlandii</i>                              | aoe          | NC_009922     | 3.12                | 2,836       | 1,228                      |
| <i>Clostridium acetobutylicum</i>                           | cac          | NC_003030     | 3.94                | 3,848       | 1,463                      |

**Table S1. Continued.**

| Species                                      | Abbreviation | Accession No. | Size of genome (Mb) | No. of CDSs | No. of COG family assigned |
|----------------------------------------------|--------------|---------------|---------------------|-------------|----------------------------|
| <b><i>Bacillales and Lactobacillales</i></b> |              |               |                     |             |                            |
| <i>Symbiobacterium thermophilum</i>          | sth          | NC_006177     | 3.57                | 3,338       | 1,350                      |
| <i>Bacillus halodurans</i>                   | bha          | NC_002570     | 4.20                | 4,066       | 1,668                      |
| <i>Bacillus subtilis</i>                     | bsu          | NC_000964     | 4.21                | 4,105       | 1,689                      |
| <i>Geobacillus kaustophilus</i>              | gka          | NC_006510     | 3.54                | 3,540       | 1,541                      |
| <b><i>Deinococcus-Thermus</i></b>            |              |               |                     |             |                            |
| <i>Thermus thermophilus</i>                  | tth          | NC_005835     | 1.89                | 2,210       | 1,154                      |
| <i>Deinococcus radiodurans</i>               | dra          | NC_001263     | 2.65                | 3,181       | 1,370                      |
| <b><i>Thermotogae</i></b>                    |              |               |                     |             |                            |
| <i>Thermotoga maritima</i>                   | tma          | NC_000853     | 1.86                | 1,858       | 1,097                      |
| <i>Fervidobacterium nodosum</i>              | fno          | NC_009718     | 1.95                | 1,750       | 976                        |
| <b><i>Acidobacteria</i></b>                  |              |               |                     |             |                            |
| <i>Acidobacteria bacterium</i>               | aba          | NC_008009     | 5.65                | 4,777       | 1,453                      |
| <i>Solibacter usitatus</i>                   | sus          | NC_008536     | 9.96                | 7,826       | 1,625                      |
| <b><i>Bacteroidetes</i></b>                  |              |               |                     |             |                            |
| <i>Bacteroides fragilis</i>                  | bfr          | NC_006347     | 5.28                | 4,625       | 1,159                      |
| <i>Flavobacterium johnsoniae</i>             | fjo          | NC_009441     | 6.10                | 5,017       | 1,334                      |
| <b><i>Cyanobacteria</i></b>                  |              |               |                     |             |                            |
| <i>Synechocystis</i> sp. PCC 6803            | syn          | NC_000911     | 3.57                | 3,264       | 1,336                      |
| <i>Anabaena</i> sp. PCC 7120                 | ana          | NC_003272     | 6.41                | 6,131       | 1,580                      |
| <b><i>Actinobacteria</i></b>                 |              |               |                     |             |                            |
| <i>Mycobacterium tuberculosis</i>            | mtu          | NC_000962     | 4.41                | 3,989       | 1,382                      |
| <i>Streptomyces coelicolor</i> A3(2)         | sco          | NC_003888     | 8.67                | 8,154       | 1,602                      |
| <b><i>Planctomycetes</i></b>                 |              |               |                     |             |                            |
| <i>Rhodopirellula baltica</i>                | rba          | NC_005027     | 7.15                | 7,325       | 1,300                      |
| <b><i>Fusobacteria</i></b>                   |              |               |                     |             |                            |
| <i>Fusobacterium nucleatum</i>               | fnu          | NC_003454     | 2.17                | 2,067       | 1,072                      |
| <b><i>Chloroflexi</i></b>                    |              |               |                     |             |                            |
| <i>Chloroflexus aurantiacus</i>              | cau          | NC_010175     | 5.26                | 3,853       | 1,377                      |
| <i>Dehalococcoides ethenogenes</i>           | det          | NC_002936     | 1.47                | 1,580       | 777                        |

## Figure Legends

Figure S1. Genetic reconstruction of sulfur respiration of *D. desulfuricans*. (A) Schematic model of components involved in sulfur-reduction via quinol-pool. (B) Comparison of the respiratory gene cluster between the genomes of *D. desulfuricans* and several members of *Deltaproteobacteria* including *Geobacter sulfurreducens* PCA (NC\_002939), *G. metallireducens* GS-15 (NC\_007517), *G. uraniireducens* Rf4 (NC\_009483), *G. lovleyi* SZ (NC\_010814) and *Desulfuromonas acetoxidans* DSM684 (NZ\_AAEW02000014 and NZ\_AAEW02000035). This locus contains genes for polysulfide reductase (blue), rhodanese-like protein (gold), porin (gold), multiheme *c*-type cytochromes (orange) and hypothetical proteins (gray).

Figure S2. Subcellular distribution of products encoded in a novel multiheme *c*-type cytochrome gene cluster in the *D. desulfuricans* genome. This figure indicates the subcellular distribution of components encoded of the gene cluster (A) and the gene organization (B). Each multiheme *c*-type cytochrome (orange), two-component signal transduction proteins (gold) and other proteins (Gray) encoded in the gene clusters is depicted according to the subcellular location predicted by SOSUIgramN<sup>1</sup> and PSORTb<sup>2</sup> programs. Number in the multiheme *c*-type cytochrome represents CXXCH heme-binding motifs.

Figure S3. Comparison of components of membrane-binding and intracellular signaling proteins among the deep-sea hydrothermal vent chemolithotrophs. The numbers of potential two-component histidine kinases and cyclic diGMP signaling proteins are

indicated.

Figure S4. Residue frequency in mesophiles, thermophiles, and hyperthermophiles compared to residue frequency in *D. desulfuricans*. This analysis was performed in 135 proteomes of archaea and bacteria. According to the optimal growth temperature (OGT), these organisms were classified into: mesophiles (20 to 59°C in OGT, 108 genomes), thermophiles (60 to 80°C, 11 genomes), and hyperthermophiles (more than 81°C, 16 genomes). White boxes indicate residues necessary for thermophily of protein.

## References

1. Imai, K., Asakawa, N., Tsuji, T. et al. 2008, SOSUI-GramN: high performance prediction for sub-cellular localization of proteins in Gram-negative bacteria, *Bioinformatics*, **2**, 417-421.
2. Gardy, J. L., Spencer, C., Wang, K. et al. 2003, PSORT-B: Improving protein subcellular localization prediction for Gram-negative bacteria, *Nucleic Acids Research*, **31**, 3613-3617.

**A**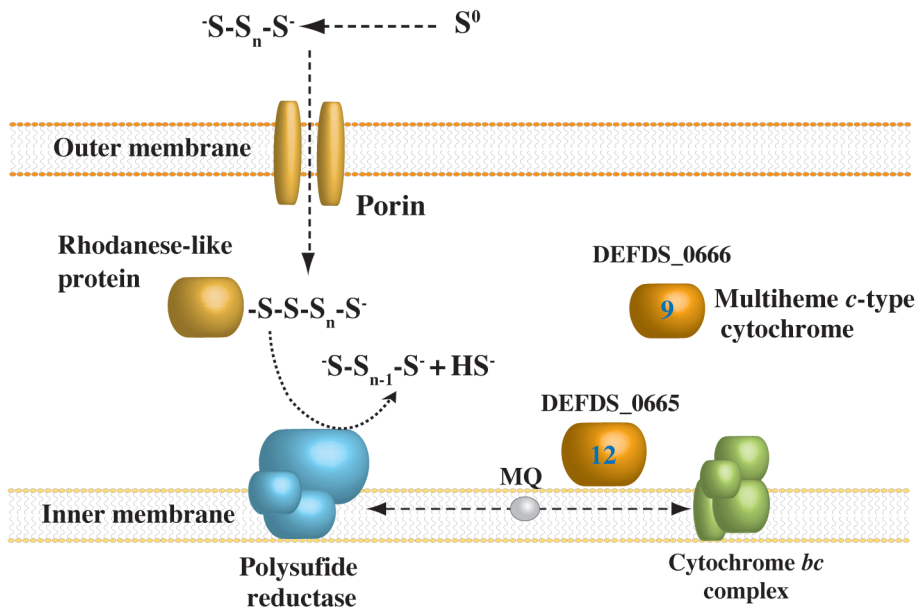**B**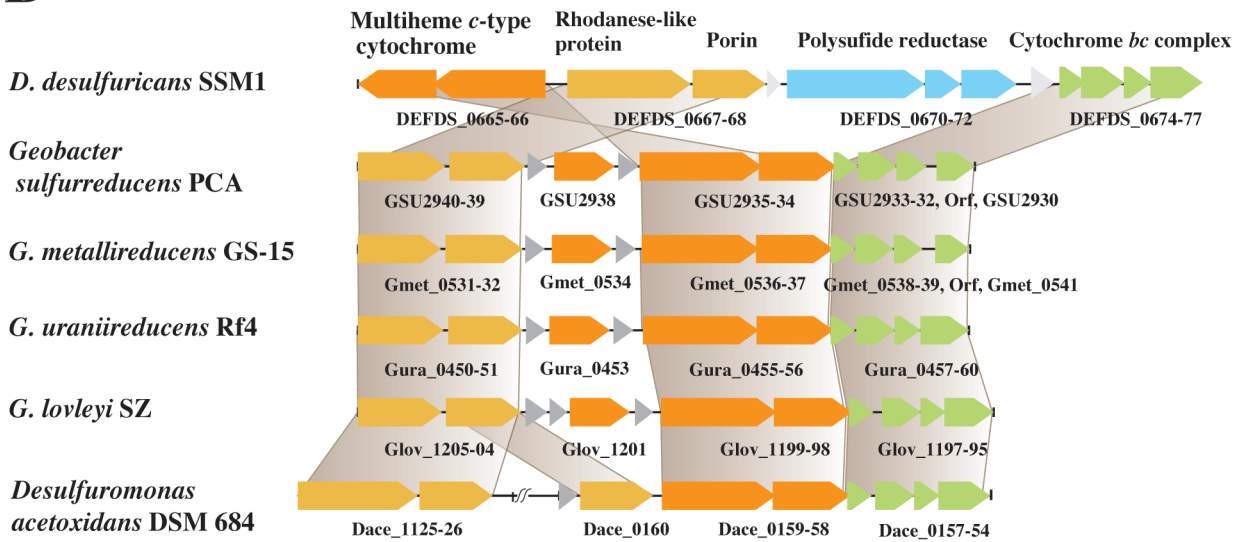

**A**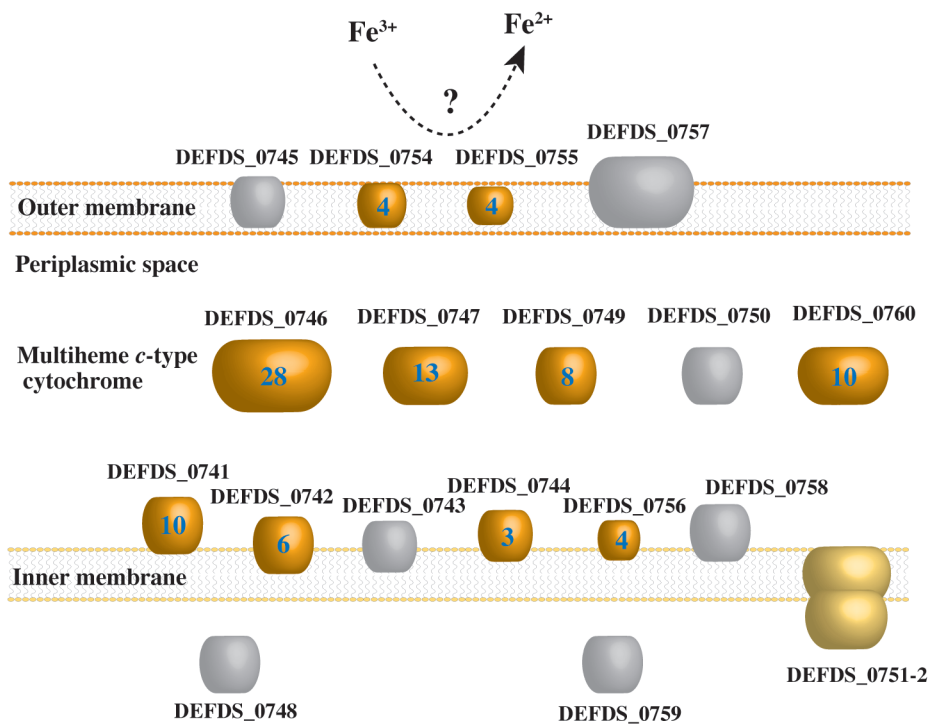**B**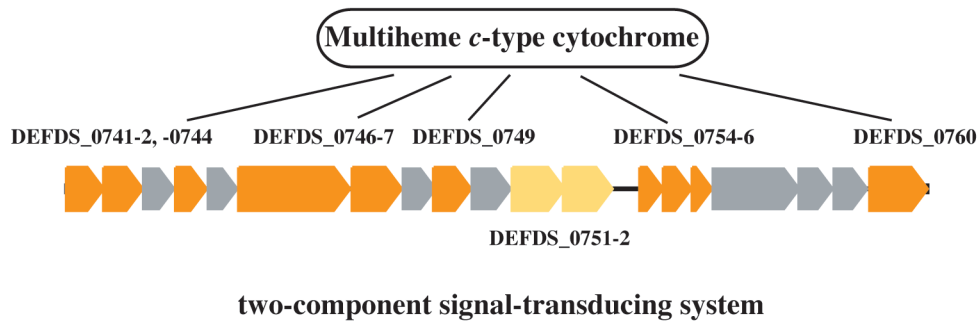

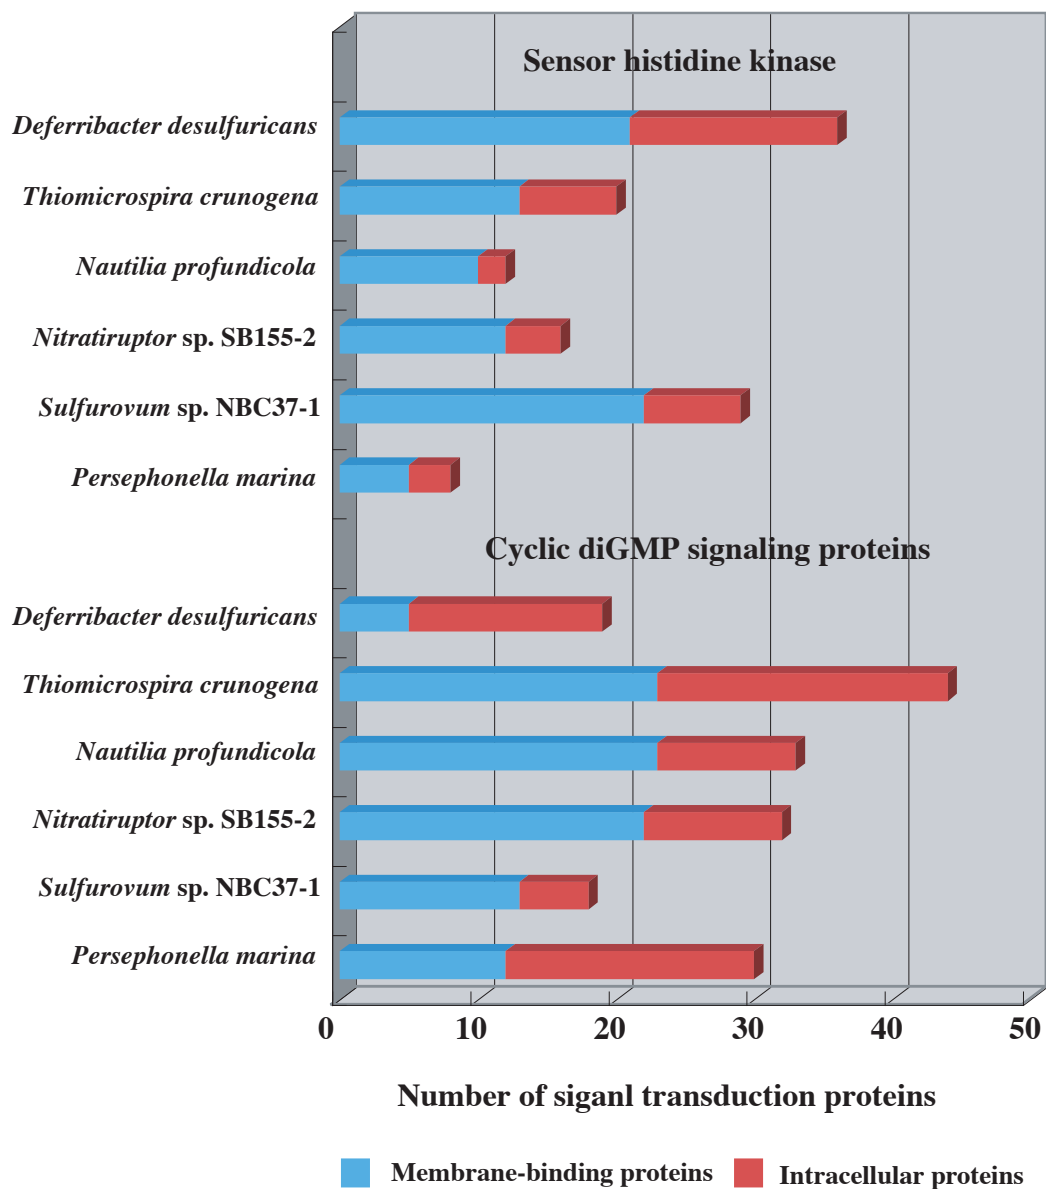

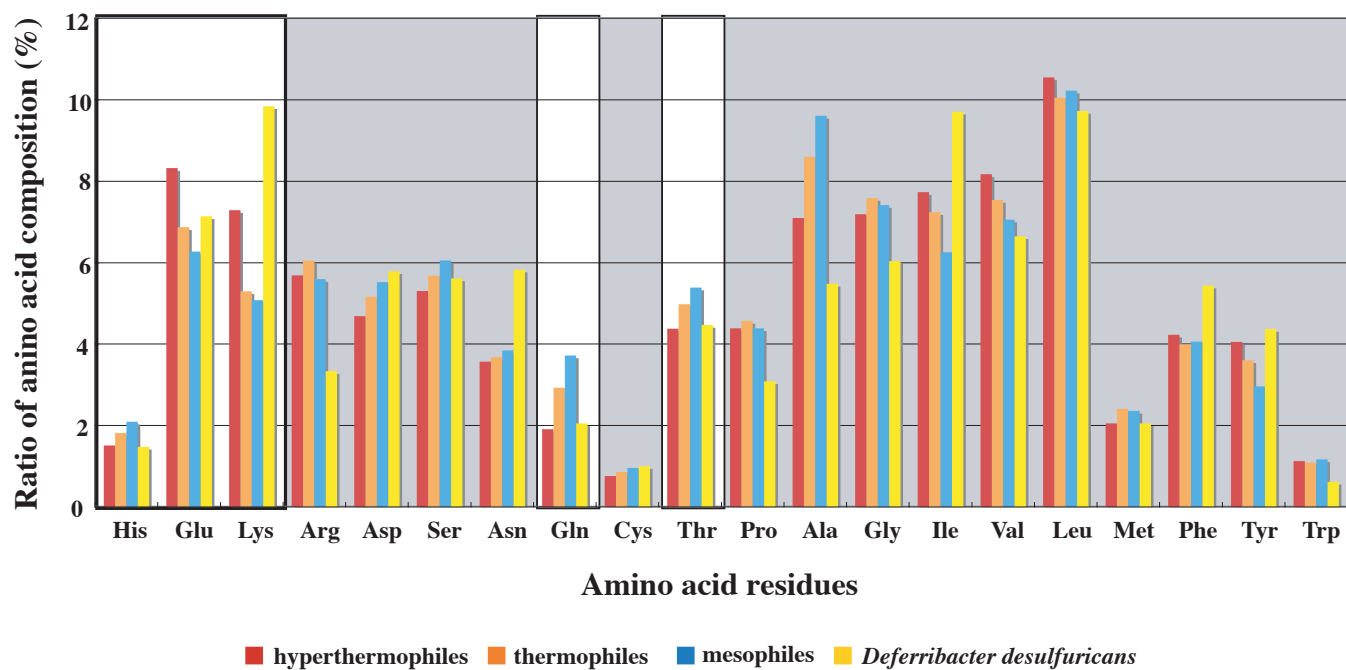

Supplement: dsq005_1.pdf [file dsq005_1.pdf]
